# Supplementary material for: Unraveling two distinct polymorph transition mechanisms in one n-type single crystal for dynamic electronics
Source: PubMed Central journal article supplement (PMC10030468; doi:10.1038/s41467-023-36871-9), 2023-03-21
Supplement: 41467_2023_36871_MOESM3_ESM.pdf [file 41467_2023_36871_MOESM3_ESM.pdf]

## Description of Additional Supplementary Files

File Name: Supplementary Movie 1

Description: In situ POM showing the **I-II heating** transition

File Name: Supplementary Movie 2

Description: In situ POM showing the **II-I cooling** transition

File Name: Supplementary Movie 3

Description: In situ POM showing the **II-III heating** transition

File Name: Supplementary Movie 4

Description: In situ POM showing the **III-II cooling** transition

File Name: Supplementary Movie 5

Description: In situ POM showing the crack formation during the II-I cooling transition

File Name: Supplementary Movie 6

Description: Video showing the thermosalient motion during the I-II heating transition

File Name: Supplementary Movie 7

Description: GIXD video during the I-II heating transition, images taken at 5 second increments

File Name: Supplementary Movie 8

Description: Movie showing the calculated vibrational mode for the quinoidal molecule at  $1581\text{ cm}^{-1}$

File Name: Supplementary Movie 9

Description: Movie showing the calculated vibrational mode for the quinoidal molecule at  $1584\text{ cm}^{-1}$

File Name: Supplementary Movie 10

Description: Movie showing the calculated vibrational mode for the quinoidal molecule at  $1636\text{ cm}^{-1}$

File Name: Supplementary Movie 11

Description: Movie showing the calculated vibrational mode for the quinoidal molecule at  $1878\text{ cm}^{-1}$

File Name: Supplementary Movie 12

Description: Movie showing the calculated vibrational mode for the quinoidal molecule at  $1610\text{ cm}^{-1}$

File Name: Supplementary Movie 13

Description: GIXD video during the II-III heating transition, images taken at 5 second increments

File Name: Supplementary Movie 14

Description: Movie showing the calculated vibrational mode for the aromatic molecule at  $1618\text{ cm}^{-1}$

File Name: Supplementary Movie 15

Description: Movie showing the calculated vibrational mode for the aromatic molecule at  $1635\text{ cm}^{-1}$
